# Supplementary material for: Toxocara canis and Toxocara cati Somatic and Excretory-Secretory Antigens Are Recognised by C-Type Lectin Receptors
Source: PubMed Central journal article supplement (PMC8001263; doi:10.3390/pathogens10030321), 2021-03-09
Supplement: pathogens-10-00321-s001.pdf [file pathogens-10-00321-s001.pdf]

## **Supplementary Material**

***Toxocara canis* and *Toxocara cati* somatic and excretory-secretory antigens are recognised  
by C-type lectin receptors**

Marie-Kristin Raulf, Bernd Lепенies, Christina Strube

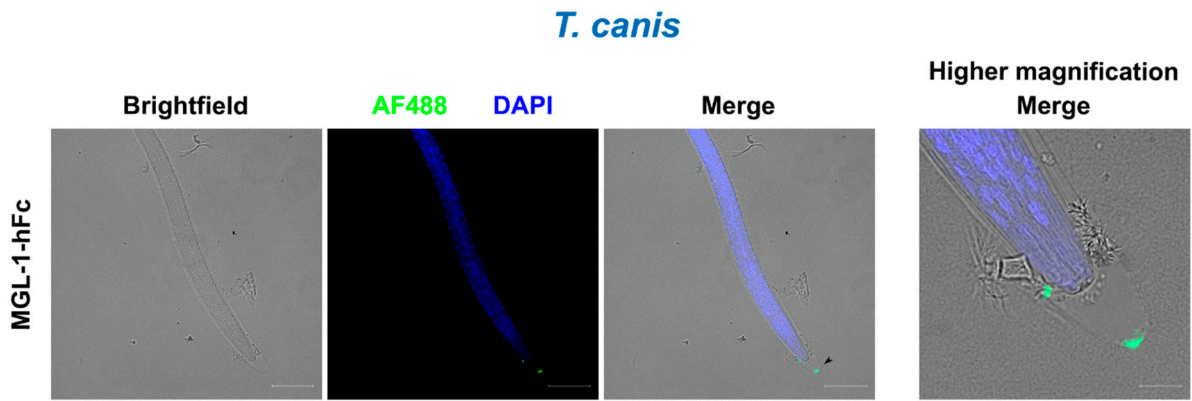

**Figure S1. MGL-1 binds to the remaining sheath of *T. canis* second stage larva.** Scale bar represents 50  $\mu\text{m}$  for lower magnification (left images) and 10  $\mu\text{m}$  for higher magnification (right image). Green fluorescence: CLR-hFc fusion protein, blue fluorescence: DAPI-stained DNA.

**Table S1. Statistical analysis of *Toxocara* spp. antigens binding to CLR-hFc fusion proteins in ELISA-based studies.** The table shows *P*-values of respective *Toxocara*/CLR binding compared to *Toxocara*/hFc binding (negative control) by paired, two-tailed Student's *t*-test. Results were considered statistically significant if  $P \leq 0.05$  (printed in bold). TSOM: *Toxocara* somatic antigen, TES: *Toxocara* excretory-secretory antigen, EDTA: ethylenediamine tetraacetic acid (test for  $\text{Ca}^{2+}$  dependency), n.d.: not determined, \*: mean OD values exceeding the threshold of 0.24.

| hFc vs.  | <i>T. canis</i>                  |                                  |               |                                  | <i>T. cati</i>                   |               |               |              |
|----------|----------------------------------|----------------------------------|---------------|----------------------------------|----------------------------------|---------------|---------------|--------------|
|          | TSOM                             | TES                              | TSOM/<br>EDTA | TES/<br>EDTA                     | TSOM                             | TES           | TSOM/<br>EDTA | TES/<br>EDTA |
| Mincle   | <b><math>\leq 0.001^*</math></b> | <b>0.004*</b>                    | <b>0.038*</b> | <b>0.034</b>                     | <b>0.001*</b>                    | <b>0.012</b>  | 0.051         | 0.110        |
| Dectin-1 | <b>0.002*</b>                    | <b>0.004*</b>                    | <b>0.007*</b> | <b>0.015</b>                     | <b>0.002*</b>                    | <b>0.004</b>  | 0.102*        | 0.100        |
| Dectin-2 | <b>0.019*</b>                    | <b><math>\leq 0.001</math></b>   | 0.118*        | <b><math>\leq 0.001^*</math></b> | <b>0.030*</b>                    | <b>0.032*</b> | 0.056*        | 0.147*       |
| SIGNR3   | <b>0.011</b>                     | <b>0.011</b>                     | <b>0.033</b>  | 0.087                            | <b>0.028*</b>                    | <b>0.013</b>  | 0.107         | 0.198        |
| DC-SIGN  | <b>0.007*</b>                    | <b>0.006*</b>                    | 0.061         | 0.078                            | <b>0.009*</b>                    | <b>0.023*</b> | <b>0.048</b>  | 0.136        |
| CLEC12A  | <b>0.006*</b>                    | <b>0.003</b>                     | <b>0.027*</b> | 0.077                            | <b>0.021*</b>                    | <b>0.004</b>  | 0.089*        | 0.086        |
| CLEC12B  | <b>0.015*</b>                    | 0.053                            | 0.086         | 0.135                            | <b>0.006*</b>                    | <b>0.041</b>  | 0.113         | 0.070        |
| MDL-1    | 0.110                            | 0.070                            | 0.337         | 0.230                            | 0.164                            | 0.110         | 0.283         | 0.143        |
| MGL-1    | <b>0.002*</b>                    | <b><math>\leq 0.001^*</math></b> | 0.118         | <b>0.050</b>                     | <b>0.003*</b>                    | <b>0.001*</b> | 0.165         | 0.209        |
| MCL      | <b>0.011*</b>                    | 0.051                            | 0.299         | 0.337                            | <b>0.025*</b>                    | 0.071         | 0.500         | 0.178        |
| Langerin | <b>0.001*</b>                    | <b>0.047</b>                     | <b>0.034*</b> | 0.241                            | <b><math>\leq 0.001^*</math></b> | <b>0.001</b>  | <b>0.008*</b> | 0.166        |

**Table S2. Statistical analysis of *Toxocara* spp.-antigens mediating elevated cytokine secretion of WT and MCL<sup>-/-</sup> bone marrow-derived dendritic cells (BMDCs).** The table shows *P*-values of respective *Toxocara* antigen stimulation compared to LPS stimulation by unpaired, two-tailed Student's *t*-test. Results were considered statistically significant if *P* ≤ 0.05 (printed in bold). TSOM: *Toxocara* somatic antigens, TES: *Toxocara* excretory-secretory products.

| LPS vs.             | IL-6            |                    |                |                    | TNF- $\alpha$   |                    |                |                    |
|---------------------|-----------------|--------------------|----------------|--------------------|-----------------|--------------------|----------------|--------------------|
|                     | <i>T. canis</i> |                    | <i>T. cati</i> |                    | <i>T. canis</i> |                    | <i>T. cati</i> |                    |
|                     | WT              | MCL <sup>-/-</sup> | WT             | MCL <sup>-/-</sup> | WT              | MCL <sup>-/-</sup> | WT             | MCL <sup>-/-</sup> |
| unstimulated        | ≤ <b>0.001</b>  | ≤ <b>0.001</b>     | ≤ <b>0.001</b> | ≤ <b>0.001</b>     | <b>0.001</b>    | ≤ <b>0.001</b>     | <b>0.001</b>   | ≤ <b>0.001</b>     |
| TSOM 2.5 $\mu$ g/ml | 0.642           | <b>0.007</b>       | 0.175          | ≤ <b>0.001</b>     | 0.737           | <b>0.017</b>       | 0.547          | <b>0.001</b>       |
| TSOM 25 $\mu$ g/ml  | <b>0.002</b>    | ≤ <b>0.001</b>     | <b>0.001</b>   | ≤ <b>0.001</b>     | <b>0.004</b>    | <b>0.003</b>       | <b>0.003</b>   | ≤ <b>0.001</b>     |
| TSOM 50 $\mu$ g/ml  | <b>0.004</b>    | <b>0.007</b>       | ≤ <b>0.001</b> | ≤ <b>0.001</b>     | <b>0.005</b>    | <b>0.042</b>       | ≤ <b>0.001</b> | ≤ <b>0.001</b>     |
| TES 2.5 $\mu$ g/ml  | <b>0.006</b>    | 0.534              | ≤ <b>0.001</b> | ≤ <b>0.001</b>     | <b>0.001</b>    | <b>0.033</b>       | ≤ <b>0.001</b> | ≤ <b>0.001</b>     |
